# Supplementary material for: A new species of Paraonis and an annotated checklist of polychaetes from mangroves of the Brazilian Amazon Coast (Annelida, Paraonidae)
Source: Zookeys. 2018 Feb 27;(740):1–34. doi: 10.3897/zookeys.740.14640 (PMC5904532; doi:10.3897/zookeys.740.14640)
Supplement: Supplementary material 1 — Brazilian records of the species identified from Amazon coast, Maranhão [file zookeys-740-001-s001.xls]

## Sheet: Sheet1
FAMILY	SPECIES	TYPE LOCALITY	COLLECTION SAMPLES	RECORDS	STATE	COORDINATES	HABITAT	SUBSTRATE	DEPTH	REFERENCES
Ampharetidae	Isolda pulchella Müller in Grube, 1858	Florianópolis, Santa Cataraina, Brazil, Ocean Atlantic.	NPM-Pol 67, NPM-Pol 84, NPM-Pol 849-850	Caranguejos Island/ São Luís Island	Maranhão	2°49'33,6''S, 44°28'51,1''W; 2°35'56''S, 44°21'11,8''W	Mangrove	Soft bottom	Intertidal	Present study
Ampharetidae	Isolda pulchella Müller in Grube, 1858	Florianópolis, Santa Cataraina, Brazil, Ocean Atlantic.	not available	São Luís Island	Maranhão	2°37'25'' - 2°38'30''S, 44°21'44''- 44°21'36''W	Mangrove	Soft bottom	Intertidal	Oliveira and Mochel (1999)
Ampharetidae	Isolda pulchella Müller in Grube, 1858	Florianópolis, Santa Cataraina, Brazil, Ocean Atlantic.	MPEG.ANL 000178	Belém	Pará	00°35’08.65”S - 47°50’51.97”W	Rock fragments	Consolidated	Intertidal	Morais and Lee (2014)
Ampharetidae	Isolda pulchella Müller in Grube, 1858	Florianópolis, Santa Cataraina, Brazil, Ocean Atlantic	not available	Guanabara Bay	Rio de Janeiro	22°24'S, 22°57'S; 42°33'W, 43°19'W	Estuary	Soft bottom	3.10 - 31.40 m	Santi and Tavares (2009)
Ampharetidae	Isolda pulchella Müller in Grube, 1858	Florianópolis, Santa Cataraina, Brazil, Ocean Atlantic.	not available	São Sebastião Channnel	São Paulo	22°44' - 23°5.2'S, 45°21' - 45°26'W	Sandy beach	Soft bottom	0 m	Omena and Amaral (2003)
Ampharetidae	Isolda pulchella Müller in Grube, 1858	Florianópolis, Santa Cataraina, Brazil, Ocean Atlantic.	not available	Guaratuba Bay	Paraná	25°50' - 25°55'S, 48°38 - 48°50'W	Estuary	Soft bottom	0 - 3 m	Blankensteyn and Moura (2002)
Ampharetidae	Isolda pulchella Müller in Grube, 1858	Florianópolis, Santa Cataraina, Brazil, Ocean Atlantic.	not available	Florianópolis	Santa Catarina	27°36'S, 48°27'W (estimated)	not available	not available	not available	Müller (1858)
Ampharetidae	Isolda pulchella Müller in Grube, 1858	Florianópolis, Santa Cataraina, Brazil, Ocean Atlantic.	IBUFRJ-1111	North-Central Santa Catarina	Santa Catarina	26°18’S - 27°18’S, 48°28'W	Marine	Soft bottom	2 - 12 m	Almeida et al. (2012)
Capitellidae	Capitella capitata (Fabricius, 1780)	West Greenland, Arctic Ocean	NPM-Pol 069,NPM-Pol 102,NPM-Pol 851-854	Caranguejos Island/ São Luís Island	Maranhão	2°49'33,6''S, 44°28'51,1''W; 2°35'56''S, 44°21'11,8''W	Mangrove	Soft bottom	Intertidal	Present study
Capitellidae	Capitella capitata (Fabricius, 1780)	West Greenland, Arctic Ocean	MPEG.ANL 000180	Belém	Pará	0°35’8.65” S - 47°50’51.97”	Rock fragments	Hard bottom	Intertidal	Morais and Lee (2014)
Capitellidae	Capitella capitata (Fabricius, 1780)	West Greenland, Arctic Ocean	not available	East Coast of Pará	Pará	0°42'2.5''S, 47°52'44.1''W; 0°50'17.3''S, 46°36°13.3''W	Salt marshes	Soft bottom, biogenic	Intertidal	Braga et al. (2011)
Capitellidae	Capitella capitata (Fabricius, 1780)	West Greenland, Arctic Ocean	not available	Paracuru Beach	Ceará	3°24’22.3”S, 39°0’98.9”W	Sandy beach	soft bottom	Intertidal	Viana et al. (2005)
Capitellidae	Capitella capitata (Fabricius, 1780)	West Greenland, Arctic Ocean	PB - POLYUFPB 883, PB - POLYUFPB 890, PB - POLY-UFPB 1084, PB - POLY-UFPB 1570	Cabedelo, Ponta do Cabo Branco, João Pessoa, Carapibus Beach, Conde, Pedra da Galé, Pitimbú	Paraíba	6°57’S, 34°50’W; 7°09’S, 34°47’W; 7º16’S, 34°48’W; 7°28’S, 34°47’W	not available	not available	not available	Assis et al. (2012)
Capitellidae	Capitella capitata (Fabricius, 1780)	West Greenland, Arctic Ocean	not available	Cachoeira River, Ilhéus	Bahia	14°46’ - 14°50’S, 39°05’ - 39°01’W	Estuary	Soft bottom	1.5 - 5 m	Ourives et al. (2011)
Capitellidae	Capitella capitata (Fabricius, 1780)	West Greenland, Arctic Ocean	not available	Guanabara Bay	Rio de Janeiro	22°44’ - 22°57'S, 42°33' - 43°19'W	Estuary	Soft bottom	Intertidal	Omena et al. (2012)
Capitellidae	Capitella capitata (Fabricius, 1780)	West Greenland, Arctic Ocean	not available	São Francisco and Araçá	São Paulo	23°53’S, 45°24’W; 23°49’S, 45°25’W	Sandy beach	Soft bottom	Intertidal	Pardo et al. (2010)
Capitellidae	Capitella capitata (Fabricius, 1780)	West Greenland, Arctic Ocean	not available	Guaratuba Bay	Paraná	25°50' - 25°55'S; 48°38 - 48°50'W	Estuary	Soft bottom	0 - 4 m	Blankensteyn and Moura (2002)
Capitellidae	Capitella capitata (Fabricius, 1780)	West Greenland, Arctic Ocean	IBUFRJ-1112	North-Central Santa Catarina	Santa Catarina	26°18’S - 27°18’S, 48°28'W	Marine	Soft bottom	2 - 12 m	Almeida et al. (2012)
Capitellidae	Capitella capitata (Fabricius, 1780)	West Greenland, Arctic Ocean	not available	Patos Lagoon	Rio Grande do Sul	32°2' - 32°10'S, 52°2' - 52°6'W	Lagoon	Soft bottom	2 - 16 m	Bemvenuti et al. (2015)
Capitellidae	Heteromastus filiformis (Claparède, 1864)	Port-Vendres, France, Mediterranean Sea, Atlantic Ocean.	NPM-Pol 070, NPM-Pol 852, NPM-Pol 856-857	Caranguejos Island/ São Luís Island	Maranhão	2°49'33,6''S, 44°28'51,1''W; 2°35'56''S, 44°21'11,8''W	Mangrove	Soft bottom	Intertidal	Present study
Capitellidae	Heteromastus filiformis (Claparède, 1864)	Port-Vendres, France, Mediterranean Sea, Atlantic Ocean.	not available	São Luís Island	Maranhão	2° 30′ 8.38″S, 44° 18′ 35.26″W	Coastal lagoon	Soft bottom	Intertidal	Mochel (1997)
Capitellidae	Heteromastus filiformis (Claparède, 1864)	Port-Vendres, France, Mediterranean Sea, Atlantic Ocean.	not available	Bragança	Pará	0°48' - 1°S, 46°36' - 46°44'W (estimated)	Estuary	Soft bottom	Intertidal	Rosa-Filho et al. (2006)
Capitellidae	Heteromastus filiformis (Claparède, 1864)	Port-Vendres, France, Mediterranean Sea, Atlantic Ocean.	not available	Ilhéus	Bahia	14°49′00′′S, 39°03′36′′W; 14°49′14′′S, 39°03′29′′W	Mangroves	Soft bottom	Intertidal	Oliveira et al. (2011)
Capitellidae	Heteromastus filiformis (Claparède, 1864)	Port-Vendres, France, Mediterranean Sea, Atlantic Ocean.	not available	Cachoeira River, Ilhéus	Bahia	14°46’ - 14°50’S, 39°05’ - 39°01’W	Estuary	Soft bottom	1.5 - 5 m	Ourives et al. (2011)
Capitellidae	Heteromastus filiformis (Claparède, 1864)	Port-Vendres, France, Mediterranean Sea, Atlantic Ocean.	not available	São Sebastião Channel	São Paulo	22°44' - 23°5.2'S; 45°21' - 45°26'W	Sandy beach	Soft bottom	Intertidal	Omena and Amaral (2003)
Capitellidae	Mediomastus californiensis Hartman, 1944	Tomales Bay, California, Pacific Ocean	NPM-Pol 73, NPM-Pol 858-865	Caranguejos Island/ São Luís Island	Maranhão	2°49'33,6''S, 44°28'51,1''W; 2°35'56''S, 44°21'11,8''W	Mangrove	Soft bottom	Intertidal	Present study
Capitellidae	Mediomastus californiensis Hartman, 1944	Tomales Bay, California, Pacific Ocean	number and local not available	Bragança	Pará	0°48' - 1°S, 46°36' - 46°44'W (estimated)	Estuary	Soft bottom	Intertidal	Rosa-Filho et al. (2006)
Capitellidae	Mediomastus californiensis Hartman, 1945	Tomales Bay, California, Pacific Ocean	not available	Big Island, Angra dos Reis	Rio de Janeiro	44°45' - 44°00'W, 22°50' - 23°20'S	Marine	Soft bottom	4 - 12 m	Brasil and Silva (2000)
Capitellidae	Mediomastus californiensis Hartman, 1947	Tomales Bay, California, Pacific Ocean	MCEM – BPO 545	Coast of Paraná	Paraná	not available	not available	not available	not available	Lana et al. (2006)
Capitellidae	Mediomastus californiensis Hartman, 1948	Tomales Bay, California, Pacific Ocean	IBUFRJ-1114	North-Central Santa Catarina	Santa Catarina	26°18’ S - 27°18’S, 48°28' W	Marine	Soft bottom	2 - 12 m	Almeida et al. (2012)
Nephtyidae	Nephtys simoni Perkins, 1980	Hutchinson Island, Florida, USA, Atlantic Ocean	NPM-Pol 455, NPM-Pol 868-875	Caranguejos Island/ São Luís Island	Maranhão	2°49'33,6''S, 44°28'51,1''W; 2°35'56''S, 44°21'11,8''W	Mangrove	Soft bottom	Intertidal	Present study
Nephtyidae	Nephtys simoni Perkins, 1980	Hutchinson Island, Florida, USA, Atlantic Ocean	not available	Algodoal, Bragança, Canela, Marudá	Pará	0°36’0.9”S, 47° 35’11.4”W; 0° 47’ 21.6”S, 46° 43’ 25.2”W; 0°37’13.6”S, 47°37’59.2”W; 0°50’17.3”,46°36’13.3”W	Salt marshes	Soft bottom, biogenic	Intertidal	Braga et al. (2013)
Nephtyidae	Nephtys simoni Perkins, 1980	Hutchinson Island, Florida, USA, Atlantic Ocean	not available	East Coast of Pará	Pará	0°4212.511S, 47°52'44.1''W; 0°50'17.3''S, 46°36°13.3''W	Salt marshes	Soft bottom, biogenic	Intertidal	Braga et al. (2011)
Nephtyidae	Nephtys simoni Perkins, 1980	Hutchinson Island, Florida, USA, Atlantic Ocean	not available	Algodoal Island	Pará	0°36'S; 47°34'W	Sandy beach	Soft bottom	Intertidal	Rosa-Filho et al. (2011)
Nephtyidae	Nephtys simoni Perkins, 1981	Hutchinson Island, Florida, USA, Atlantic Ocean	not available	São Paulo Offshore	São Paulo	23"25'S - 24"22'S, 44°33'W - 45°16'W	Marine	Soft bottom	15 - 115 m	Paiva (1993)
Nereididae	Alitta succinea (Leuckart, 1847)	Cuxhaven, Germany, North Sea	NPM-Pol 083, NPM-Pol 876-877	Caranguejos Island/ São Luís Island	Maranhão	2°49'33,6''S, 44°28'51,1''W; 2°35'56''S, 44°21'11,8''W	Mangrove	Soft bottom	Intertidal	Present study
Nereididae	Alitta succinea (Leuckart, 1847)	Cuxhaven, Germany, North Sea	not available	São Luís Island	Maranhão	2°30'8.38''S, 44°18'35.2'' W	Coastal lagoon	Soft bottom	Intertidal	Mochel (1997)
Nereididae	Alitta succinea (Leuckart, 1847)	Cuxhaven, Germany, North Sea	not available	East Coast of Pará	Pará	0°4212.511S, 47°52'44.1''W; 0°50'17.3''S, 46°36°13.3''W	Salt marshes	Soft bottom, biogenic	Intertidal	Braga et al. (2011)
Nereididae	Alitta succinea (Leuckart, 1847)	Cuxhaven, Germany, North Sea	not available	Fortaleza Island and Furo do Meio	Pará	8°46′47.27′′S47°81′51.88′′W; 8°52′26′′S, 46°83.8′59′′W	Mangrove	Soft bottom	Intertidal	Andrade et al. (2014)
Nereididae	Alitta succinea (Leuckart, 1847)	Cuxhaven, Germany, North Sea	not available	Algodoal, Bragança, Canela, Marudá	Pará	0°36’0.9”S, 47° 35’11.4”W; 0° 47’ 21.6”S, 46° 43’ 25.2”W; 0°37’13.6”S, 47°37’59.2”W; 0°50’17.3”,46°36’13.3”W	Saltmarshes	Soft bottom, biogenic	Intertidal	Braga et al. (2013)
Nereididae	Alitta succinea (Leuckart, 1847)	Cuxhaven, Germany, North Sea	MPEG.ANL 000165-166	Belém	Pará	00°35'08.65''S - 47°50'51.97''W	Rock fragments	Hard bottom	Intertidal	Morais and Lee (2014)
Nereididae	Alitta succinea (Leuckart, 1847)	Cuxhaven, Germany, North Sea	not available	Pina Basin	Pernambuco	08°05S - 34°54'W	Estuary	Soft bottom	Intertidal	Sette et al. (2013)
Nereididae	Alitta succinea (Leuckart, 1847)	Cuxhaven, Germany, North Sea	not available	Anchieta	Espírito Santo	18°20'S - 26°34'S, 39°39'W - 47°22'W	Marine	Hard bottom	7 - 8 m	Rullier and Amoureux (1979)
Nereididae	Alitta succinea (Leuckart, 1847)	Cuxhaven, Germany, North Sea	not available	Cachoeira River, Ilhéus	Bahia	14°46’ - 14°50’S, 39°05’ - 39°01’W	Estuary	Soft bottom	1.5 - 5 m	Ourives et al. (2011)
Nereididae	Alitta succinea (Leuckart, 1847)	Cuxhaven, Germany, North Sea	not available	Ubatuba Bay	São Paulo	23°25'S - 23°27'S, 45°01'W - 45°03'W	Marine	Soft bottom	4 - 13 m	Santos and Pires-Vanin (2004)
Nereididae	Alitta succinea (Leuckart, 1847)	Cuxhaven, Germany, North Sea	ZUEC-POL 9998; MZUSP 140	not available	Paraná	not available	not available	not available	not available	Lana et al. (2006)
Nereididae	Alitta succinea (Leuckart, 1847)	Cuxhaven, Germany, North Sea	IBUFRJ-1130	North-Central Santa Catarina	Santa Catarina	26°18’S - 27°18’S, 48°28' W	Marine	Soft bottom	2 - 12 m	Almeida et al. (2012)
Nereididae	Alitta succinea (Leuckart, 1847)	Cuxhaven, Germany, North Sea	not available	Patos Lagoon	Rio Grande do Sul	32°2'06"S, 52°5'56"W	Coastal lagoon	not available	not available	Colling et al. (2007)
Nereididae	Namalycastis fauveli Nageswara Rao, 1981	Tachin River, Thailand, Indian Ocean	NPM-Pol 086, NPM-Pol 109, NPM-Pol 878-881, NPM-Pol 883	Caranguejos Island/ São Luís Island	Maranhão	2°49'33,6''S, 44°28'51,1''W; 2°35'56''S, 44°21'11,8''W	Mangrove	Soft bottom	Intertidal	Present study
Nereididae	Namalycastis geayi (Gravier, 1901)	French Guiana, Atlantic Ocean	NPM-Pol 82, NPM-Pol 882, NPM-Pol 884	Caranguejos Island	Maranhão	2°49'33,6''S, 44°28'51,1''W	Mangrove	Soft bottom	Intertidal	Present study
Nereididae	Namalycastis senegalensis (Saint-Joseph, 1901)	Senegal, Atlantic Ocean	NPM-Pol 105	Caranguejos Island	Maranhão	2°49'33,6''S, 44°28'51,1''W	Mangrove	Soft bottom	Intertidal	Present study
Nereididae	Namalycastis senegalensis (Saint-Joseph, 1901)	Senegal, Atlantic Ocean	BMNH ZK 1923.9.25.14–16, HZM PE405	Marajós Island and Amazon River estuary	Pará	0°06"S, 50°10'W	Estuary	not available	not available	Glasby (1999)
Oenonidae	Arabella iricolor Montagu, 1804	South coast of Devonshire, UK, Atlantic Ocean	NPM-Pol 115, NPM-Pol 090, NPM-Pol 886	Caranguejos Island/ São Luís Island	Maranhão	2°49'33,6''S, 44°28'51,1''W/ 2°35'56''S, 44°21'11,8''W	Mangrove	Soft bottom	Intertidal	Present study
Oenonidae	Arabella iricolor Montagu, 1804	South coast of Devonshire, UK, Atlantic Ocean	not available	São Luís Island	Maranhão	2°37'25'' - 2°38'30'' S, 44°21'44'' - 44°21'36''W	Mangrove	Soft bottom	Intertidal	Oliveira and Mochel (1999)
Oenonidae	Arabella iricolor Montagu, 1804	South coast of Devonshire, UK, Atlantic Ocean	not available	Guarajuba	Bahia	13°00'S, 38°32'W	Coral reef	Hard bottom	5 - 6 m	Santa-Isabel et al. (2000)
Oenonidae	Arabella iricolor Montagu, 1804	South coast of Devonshire, UK, Atlantic Ocean	not available	São Sebastião	São Paulo	23"25'S - 24"22'S, 44°33'W - 45°16'W	Marine	Soft bottom	15 m	Paiva (1993)
Oenonidae	Arabella iricolor Montagu, 1804	South coast of Devonshire, UK, Atlantic Ocean	not available	Coast of Paraná	Paraná	25°18'S, 48°05'W; 25°58'S, 48°35'W	not available	not available	not available	Lana et al. (2006)
Paraonidae	Paraonis amazonIca sp. nov.	Maranhão, Amazon Coast, Brazil, Atlantic Ocean	NPM-Pol 906, NPM-Pol 907, NPM-Pol 908, NPM-Pol 929, NPM-Pol 930	Caranguejos Island/ São Luís Island	Maranhão	2°49'33,6''S, 44°28'51,1''W; 2°35'56''S, 44°21'11,8''W	Mangrove	Soft bottom	Intertidal	Present study
Pilargidae	Sigambra bassi (Hartman, 1945)	Florida, USA, Atlantic Ocean	NPM-Pol 111	São Luís Island	Maranhão	2°49'33,6''S, 44°28'51,1''W; 2°35'56''S, 44°21'11,8''W	Mangrove	Soft bottom	Intertidal	Present study
Pilargidae	Sigambra bassi (Hartman, 1945)	Florida, USA, Atlantic Ocean.	not available	São Sebastião Channel	São Paulo	22°44' - 23°5.2'S; 45°21' - 45°26'W	Sandy beach	Soft bottom	0 m	Omena and Amaral (2003)
Pilargidae	Sigambra grubii Müller in Grube, 1858	Florianópolis, Santa Cataraina, Brazil, Ocean Atlantic.	NPM-Pol 110, NPM-Pol 887-888	Caranguejos Island/ São Luís Island	Maranhão	2°49'33,6''S, 44°28'51,1''W; 2°35'56''S, 44°21'11,8''W	Mangrove	Soft bottom	Intertidal	Present study
Pilargidae	Sigambra grubii Müller in Grube, 1858	Florianópolis, Santa Cataraina, Brazil, Ocean Atlantic.	not available	São Luís Island	Maranhão	2°37'25'' - 2°38'30'' S; 44°21'44'' - 44°21'36''W	Mangrove	Soft bottom	Intertidal	Oliveira and Mochel (1999)
Pilargidae	Sigambra grubii Müller in Grube, 1858	Florianópolis, Santa Cataraina, Brazil, Ocean Atlantic.	not available	Algodoal, Bragança, Canela, Marudá	Pará	0°36’0.9”S, 47°35’11.4”W; 0°47’21.6”S, 46°43’25.2”W; 0°37’13.6”S, 47°37’59.2”W; 0°50’17.3”,46°36’13.3”W	Salt marshes	Soft bottom, biogenic	Intertidal	Braga et al. (2013)
Pilargidae	Sigambra grubii Müller in Grube, 1858	Florianópolis, Santa Cataraina, Brazil, Ocean Atlantic.	not available	Piauí River	Sergipe	11°22'30" S, 32°22'33" W	Estuary	Soft bottom	1 - 27 m	Santos et al. (1994)
Pilargidae	Sigambra grubii Müller in Grube, 1858	Florianópolis, Santa Cataraina, Brazil, Ocean Atlantic.	not available	Big Island, Angra dos Reis	Rio de Janeiro	44°45' - 44°00'W, 22°50' - 23°20'S	Marine	Soft bottom	4 - 12 m	Brasil and Silva (2000)
Pilargidae	Sigambra grubii Müller in Grube, 1858	Florianópolis, Santa Cataraina, Brazil, Ocean Atlantic.	not available	São Sebastião Channel	São Paulo	22°44' - 23°5.2'S; 45°21' - 45°26'W	Sandy beach	Soft bottom	0 m	Omena and Amaral (2003)
Pilargidae	Sigambra grubii Müller in Grube, 1858	Florianópolis, Santa Cataraina, Brazil, Ocean Atlantic.	not available	Florianópolis	Santa Catarina	27°36'S, 48°27'W (estimated)	not available	not available	not available	Müller (1858)
Pilargidae	Sigambra grubii Müller in Grube, 1858	Florianópolis, Santa Cataraina, Brazil, Ocean Atlantic.	USNM 103016, USNM 103014, USNM 123091, USNM 103013, USNM 103015	Conceição Lagoon, Florianópolis	Santa Catarina	27°36'24"S, 48°27'42"W; 27°36'24"S, 48°27'36"W; 27°36'30"S, 48°26'30"W,	Coastal lagoon	Soft bottom	Intertidal	Salazar-Vallejo (1990)
Pilargidae	Sigambra grubii Müller in Grube, 1858	Florianópolis, Santa Cataraina, Brazil, Ocean Atlantic.	not available	Patos Lagoon	Rio Grande do Sul	32°2' - 32°10'S, 52°2' - 52°6'W	Lagoon	Soft bottom	2 - 16 m	Bemvenuti et al. (2015)
Syllidae	Exogone (Exogone) breviantennata Hartmann-Schröder, 1959	Estero Jaltepeque, El Salvador, Pacific Ocean	NPM-Pol 112, NPM-Pol 889-892	São Luís Island	Maranhão	2°35'56''S, 44°21'11,8''W	Mangrove	Soft bottom	Intertidal	Present study
Syllidae	Exogone (Exogone) breviantennata Hartmann-Schröder, 1960	Estero Jaltepeque, El Salvador, Pacific Ocean	MZUSP 1317-1319, MZUSP 2066, MZUSP 2068, MZUSP 2072-2077	Mataraca, Traição Bay, Tinto River, Cabedelo, João Pessoa, Conde, Pitimbu	Paraíba	06°36'S, 34°57'W; 06°41'S, 34°55'W; 06°45'S, 34°55'W; 06°58'S, 34°50'W; 07°4.243'S 34°49.291'W; 07°14'S 34°47'W; 07°17'S 34°48'W; 07°19'S, 34°47'W; 07°21'S, 34°47'W; 07°28.362'S, 34°47'W	Marine	Hard bottom	Intertidal	Paresque et al. (2014)
Syllidae	Exogone (Exogone) breviantennata Hartmann-Schröder, 1961	Estero Jaltepeque, El Salvador, Pacific Ocean	MZUSP 2069-2070, MZUSP 2078	Goiana, Itamaracá Island	Pernambuco	7°37'S, 34°48'W; 07°44'S, 34°49'W; 07°43.944'S, 34°49.200'W	Marine	Hard bottom	Intertidal	Paresque et al. (2014)
Syllidae	Exogone (Exogone) breviantennata Hartmann-Schröder, 1962	Estero Jaltepeque, El Salvador, Pacific Ocean	MZUSP 1306, MZUSP 1307 - 1316, MZUSP 2071	Vitória	Espirito Santo	20°18'S, 40°17'W	Marine, rock shore, biogenic	Hard bottom, soft bottom	Intertidal	Paresque et al. (2014)
Syllidae	Exogone (Exogone) breviantennata Hartmann-Schröder, 1963	Estero Jaltepeque, El Salvador, Pacific Ocean	not available	Ubatuba, Caraguatatuba, São Sebastião, Guarujá, Santos, Peruíbe	São Paulo	23°29'20''S, 45°06'25''W; 23°37'34''S 45°22'31''W; 23°44'54''S, 45°24'33''W; 23°46'48''S 45°39'51''W; 23°48'54''S, 45°24'24''W; 23°49'16''S, 45°24'35'W; 23°49'51''S, 45°25'52''W; 23°49'S, 45°28'08''W; 23°50'12''S, 45°30'40''W, 23°52'S 46°08'W; 23°58'20''S, 46°11'02''W; 24°00'34''S 46°19'25''W; 23°58'39''S, 46°22'08''W; 23°58'55''S 46°22'48''W; 24°22'01''S 47°00'31''W; 23°21'25''S 44°51'55''W; 23°…	Rock shores, sand beaches	Hard bottom, soft bottom	Intertidal	Paresque et al. (2014)
